# Supplementary material for: Provision of Mental Health Services as a Quality Indicator for Adolescent Substance Abuse Treatment Facilities
Source: Atypon-hosted journal article supplement (doi:10.1176/appi.ps.201300517), 2014-12-17
Supplement: appi.ps.201300517_ds001.pdf [file appi.ps.201300517_ds001.pdf]

The study “Provision of Mental Health Services as a Quality Indicator for Adolescent Substance Abuse Treatment Facilities,” funded by grant 5R01DA017507 from the National Institute on Drug Abuse (NIDA) and supported by contract 270-07-0191 from the Substance Abuse and Mental Health Services Administration Center for Substance Abuse Treatment, was supported through the following contracts and grantees:

Targeted Capacity Expansion/HIV (Study: TCE; CSAT/SAMHSA contracts 270-2003-00006, 270-2007-00004C, 277-00-6500 and grantees: TI-16386, TI-16400), Young Offenders Reentry Program (Study: YORP; CSAT/SAMHSA contract 270-2003-00006 and 270-2007-00004C; and grantees: TI-16992, TI-17070, TI-17071), Drug Court (Study: DC; CSAT/SAMHSA contract 270-2003-00006 and 270-2007-00004C; and grantees: TI-17433, TI-17476, TI-17490), Assertive Adolescent Family Treatment (Study: AAFT; CSAT/SAMHSA contract 270-2003-00006 and 270-2007-00004C; and grantees: TI-17604, TI-17728, TI-17755, TI-17761, TI-17765, TI-17769, TI-17779, TI-17788, TI-17812, TI-17830), Cannabis Youth Treatment (Study: CYT; CSAT/SAMHSA contracts 270-97-7011, 270-00-6500, 270-2003-00006; and grantees TI-11317, TI-11321), Adolescent Treatment Model (Study: ATM; CSAT/SAMHSA contracts 270-98-7047, 270-97-7011, 277-00-6500, 270-2003-00006; and grantees: TI-11423, TI-11422, TI-11871, TI-11894, TI-11892, TI-11874), Strengthening Communities–Youth (Study: SCY; CSAT/SAMHSA contracts 277-00-6500, 270-2003-00006; and grantees: TI-13313, TI-13356, TI-13308, TI-13323), Effective Adolescent Treatment (Study: EAT; CSAT/SAMHSA contract 270-2003-00006; and grantees: TI-15678, TI-15670, TI-15486, TI-15413, TI-15562, TI-15514, TI-15672, TI-15478, TI-15447, TI-15545, TI-15671, TI-15527, TI-15489, TI-15485, TI-15584, TI-15421, TI-15586, TI-15469, TI-15677), Targeted Capacity Expansion (Study: TCE; CSAT/SAMHSA contract 270-2003-00006, 270-2007-00004C, 277-00-6500 and grantees: TI-15458).
